# Supplementary material for: Sol-gel derived materials as substrates for neuronal differentiation: effects of surface features and protein conformation
Source: Royal Society of Chemistry journal article supplement (doi:10.1039/b602008a), 2006-01-01

Supplementary Figure 1. Fluorescence emission spectra of fibronectin labeled with AlexaFluor 488 carboxylic acid (donor) and AlexaFluor 546 maleimide (acceptor) molecules on random amines and free cysteines (FnIII<sub>7</sub> and FnIII<sub>15</sub>). The labeled fibronectin was subjected to series denaturation using guanidine hydrochloride in phosphate buffer and excited near the donor absorption wavelength ( $\lambda_{\text{max}} = 495$  nm). Unconjugated AlexaFluor 488 emission maximum is 520 nm, AlexaFluor 546 ( $\lambda_{\text{max}} = 554$ ) emission maximum is 570 nm. (a) The spectra were normalized to the peak donor emission. FRET efficiency is basically eliminated at 6 M guanidine hydrochloride. The spectral data was averaged over 5 labeled protein samples prepared and tested on separate days. The remaining acceptor emission at 6.0 M guanidine hydrochloride is due to intermolecular forces. (b) Calibration curve of fibronectin denaturation.

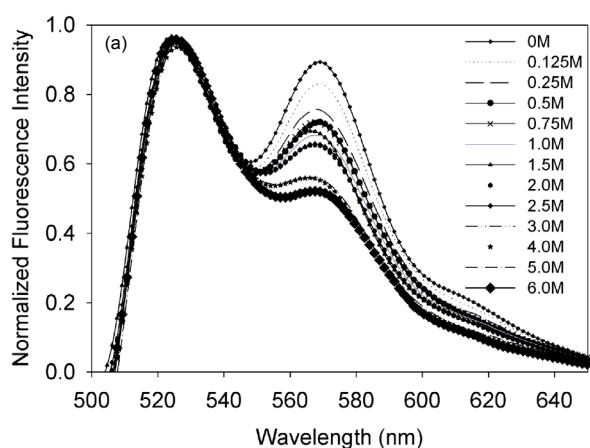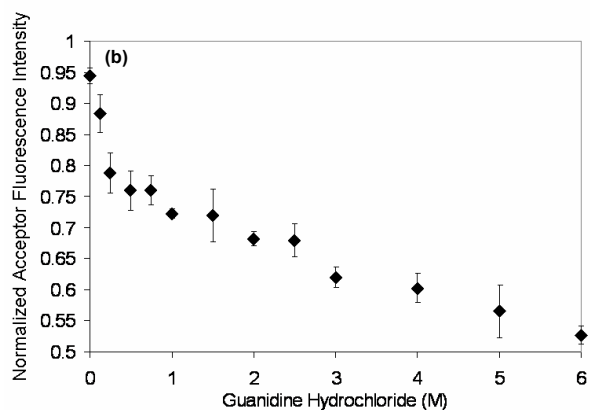

Supplement: b602008a.pdf [file b602008a.pdf]
